# Supplementary material
Source: publisher site journal article supplement (http://kjim.org/upload/media/kjim-2019-039-suppl2.pdf)
Supplement: Supplementary file 1 [file kjim-2019-039-suppl2.pdf]

**Supplementary Table 2. Patients' baseline characteristics in the whole population**

| Characteristic          | POBA (n = 528) | Stenting (n = 801) | p value |
|-------------------------|----------------|--------------------|---------|
| Age                     | 68.68 ± 8.68   | 69.73 ± 9.73       | 0.043   |
| Male sex                | 392 (74.2)     | 656 (81.9)         | 0.001   |
| BMI                     | 23.80 ± 3.80   | 23.28 ± 3.28       | 0.017   |
| Hypertension            | 414 (78.4)     | 606 (75.7)         | 0.273   |
| DM                      | 364 (68.9)     | 464 (57.9)         | < 0.001 |
| Hypercholesterolemia    | 209 (39.6)     | 330 (41.2)         | 0.596   |
| Current smoker          | 121 (22.9)     | 268 (33.5)         | < 0.001 |
| CHF                     | 40 (7.6)       | 57 (7.1)           | 0.836   |
| CAD                     | 313 (59.3)     | 454 (56.7)         | 0.377   |
| CKD                     | 157 (29.7)     | 150 (18.7)         | < 0.001 |
| Previous stroke         | 94 (17.8)      | 117 (14.6)         | 0.138   |
| Previous bypass surgery | 56 (10.6)      | 61 (7.6)           | 0.074   |
| Previous amputation     | 60 (11.4)      | 32 (4.0)           | < 0.001 |
| Previous PTA            | 83 (15.7)      | 97 (12.1)          | 0.072   |
| CLI                     | 233 (44.1)     | 238 (29.7)         | < 0.001 |
| Aspirin                 | 449 (87.2)     | 687 (87.3)         | > 0.999 |
| Clopidogrel             | 413 (80.2)     | 689 (87.5)         | < 0.001 |
| Cilostazol              | 212 (41.2)     | 335 (42.6)         | 0.657   |
| Statin                  | 361 (70.1)     | 574 (72.9)         | 0.294   |

Values are presented as mean ± SD or number (%).

POBA, plain old balloon angioplasty; BMI, body mass index; DM, diabetes mellitus; CHF, congestive heart failure; CAD, coronary artery disease; CKD, chronic kidney disease; PTA, percutaneous transluminal angioplasty; CLI, critical limb ischemia.
